1 **Phylogenomic Analysis of Ants, Bees and Stinging Wasps: Improved Taxon**  
2 **Sampling Enhances Understanding of Hymenopteran Evolution**

3

4 **Short title:** Phylogenomic Analysis of Aculeata

5

6 **Authors:**

7 Michael G. Branstetter<sup>a,b</sup>, Bryan N. Danforth<sup>c</sup>, James P. Pitts<sup>d</sup>, Brant C. Faircloth<sup>e</sup>, Philip  
8 S. Ward<sup>f</sup>, Matthew L. Buffington<sup>g</sup>, Michael W. Gates<sup>g</sup>, Robert R. Kula<sup>g</sup>, Seán G. Brady<sup>b</sup>

9

10 **Author Affiliations:**

11 <sup>a</sup>Department of Biology, University of Utah, 257 South 1400 East, Salt Lake City, UT  
12 84112, USA

13 <sup>b</sup>Department of Entomology, National Museum of Natural History, Smithsonian  
14 Institution, PO Box 37012, 10th & Constitution Aves. NW, Washington, D.C., 20560,  
15 USA

16 <sup>c</sup>Department of Entomology, 3119 Comstock Hall, Cornell University, Ithaca, NY 14853,  
17 USA

18 <sup>d</sup>Utah State University, Department of Biology, 5305 Old Main Hill, Logan, UT 84322-  
19 5305, USA

20 <sup>e</sup>Department of Biological Sciences and Museum of Natural Science, Louisiana State  
21 University, Baton Rouge, LA 70803, USA

22 <sup>f</sup>Department of Entomology and Nematology, University of California, Davis, One  
23 Shields Avenue, Davis, CA 95616, USA

<sup>g</sup>Systematic Entomology Laboratory, Beltsville Agricultural Research Center,  
Agricultural Research Service, U.S. Department of Agriculture, *c/o* Department of  
Entomology, National Museum of Natural History, Smithsonian Institution, PO Box  
37012, 10th & Constitution Ave. NW, Washington, D.C., 20560, USA

**Corresponding Author:**

Michael G. Branstetter; Department of Biology, University of Utah, 257 South 1400 East,  
Salt Lake City, UT 84112, USA; Phone: 801-581-6609; Email:  
[mgbranstetter@gmail.com](mailto:mgbranstetter@gmail.com)

## Abstract

The importance of taxon sampling in phylogenetic accuracy is a topic of active debate. We investigated the role of taxon sampling in causing incongruent results between two recent phylogenomic studies of stinging wasps (Hymenoptera: Aculeata), a diverse lineage that includes ants, bees and the majority of eusocial insects. Using target enrichment of ultraconserved element (UCE) loci, we assembled the largest aculeate phylogenomic data set to date, sampling 854 loci from 187 taxa, including 30 out of 31 aculeate families, and a diversity of parasitoid outgroups. We analyzed the complete matrix using multiple analytical approaches, and also performed a series of taxon inclusion/exclusion experiments, in which we analyzed taxon sets identical to and slightly modified from the previous phylogenomic studies. Our results provide a highly supported phylogeny for virtually all aculeate lineages sampled, supporting ants as sister to Apoidea (bees+apoid wasps), bees as sister to Philanthinae+Pemphredoninae (lineages within a paraphyletic Crabronidae), Melittidae as sister to remaining bees, and paraphyly of cuckoo wasps (Chrysidoidea). Our divergence dating analyses estimate ages for aculeate lineages in close concordance with the fossil record. Our analyses also demonstrate that outgroup choice and taxon evenness can fundamentally impact topology and clade support in phylogenomic inference.

**Keywords:** ultraconserved elements, phylogenomics, Hymenoptera, Aculeata, next-generation sequencing, taxon sampling

# Introduction

The role of taxon sampling in improving phylogenetic accuracy is a topic of long-term controversy (1–9). Rosenberg & Kumar (8) argued that increasing the number of characters sampled is a better investment of resources compared to adding taxa. However, this conclusion has received much criticism and many subsequent studies have argued the opposite point (4,6), including some recent investigations that have employed genome-scale data (7,10,11). In the current age of phylogenomics, in which it is now possible to generate data sets with hundreds to thousands of loci (12,13), the argument over the relative importance of taxon versus character sampling has become largely irrelevant, with the more important question being: does improved taxon sampling increase phylogenetic accuracy? Here, we examine this question using a genome-scale data set that focuses on relationships within a major clade of insects.

Encompassing over 120,000 described species and having an estimated richness that might exceed two million species, the insect order Hymenoptera represents one of four insect megaradiations, (14–16). This extreme diversity includes many important lineages (*e.g.* sawflies, wood wasps, parasitic wasps), with arguably the most well known taxa belonging to the stinging wasps (Aculeata). The aculeates have attracted much attention because they include all eusocial Hymenoptera, most notably the ecologically and economically important ants and bees (17,18), and also the eusocial wasps (*e.g.*, paper wasps, hornets, and yellow jackets) (19). Eusociality has in fact evolved independently at least 6–8 times within the clade, making the group a model for studying the evolution of

sociality (20–25). Outside of eusocial lineages, the group exhibits a wide range of life history strategies, with most species tending to be solitary or subsocial predators, specializing on a wide variety of arthropod prey (26,27). A number of taxa have also evolved endoparasitic or even herbivorous feeding strategies (*e.g.*, pollen and nectar) (14,15).

Given their diversity and importance, establishing a robust phylogeny and classification of the aculeates is of broad interest. Currently, the Aculeata includes over 70,000 described species and is divided into 9 superfamilies and 31 families (28). This classification is based upon a molecular study that found several morphologically circumscribed superfamilies and families to be non-monophyletic, most notably the Vespoidea, Bradynobaenidae, and Tiphidae (28). More recent molecular studies have also provided new hypotheses for the phylogenetic positions of bees (29) and ants (30,31). Despite these improvements, considerable uncertainty exists as to the relationships among superfamilies and families within Aculeata.

To date, most molecular studies of Hymenoptera have used traditional Sanger sequencing methods, resulting in data sets with decent taxon sampling, but few loci and often low clade support (28,29,32–34). Several recent studies have instead employed next-generation sequencing approaches, but so far these have suffered from including few taxa (30,31,35). Two phylogenomic studies in particular produced conflicting relationships with regard to the phylogenetic position of ants. In the study of Johnson *et al.* (30) the authors used transcriptome data to resolve relationships among aculeate superfamilies

and found ants to be sister to apoid wasps and bees (Apoidea), a novel and biologically attractive result. Conversely, Faircloth *et al.* (31), using hundreds of ultraconserved element loci (UCEs), recovered ants as sister to all other aculeate superfamilies (minus Chrysidoidea, which was not represented). Despite both studies employing genome-scale data, each produced highly supported but conflicting results. One potential problem for both studies was sparse taxon sampling, with Johnson *et al.* (30) including all superfamilies, but only 19 taxa, and Faircloth *et al.* (31) including 44 taxa, spanning six out of seven superfamilies, but with sampling biased towards the ants and missing a key outgroup (Chrysidoidea).

To test the hypothesis that taxon sampling caused the incongruent results between these phylogenomic studies, and to address important remaining uncertainties within Aculeata at the family level, we have generated the largest phylogenomic data set to date for the Aculeata. Building upon the study of Faircloth *et al.* (31), we have assembled a UCE data set comprising 187 taxa that includes all aculeate superfamilies, 30 out of 31 aculeate families (missing only Scolebythidae), and a diversity of outgroup superfamilies from across Hymenoptera. We analyzed the complete, 187-taxon matrix using multiple analytical approaches and recovered a highly supported phylogeny for virtually all aculeate lineages sampled. We also focused our sensitivity analyses on the placement of ants and bees within the Aculeata and found that taxon sampling can have a major impact on results even with genome-scale data.

## Results

# *Sequencing Results*

To generate our phylogenomic data set we used a recently developed approach that combines the targeted enrichment of ultraconserved element loci (UCEs) with multiplexed next-generation sequencing (36). We followed published lab protocols (31,36; see also materials and methods below) and used a Hymenoptera-specific probe set that targets 1,510 UCE loci from across the entire order. Using this approach we sequenced new molecular data for 139 taxa, and we combined these data with 16 taxa from Faircloth et al. (31) and 32 taxa from available genomes, resulting in a final data set that included 187 taxa (see electronic supporting information S1, Tables 1 and 2).

Within our taxon set we included 136 samples from within the Aculeata, representing 30 out of 31 recognized aculeate families (missing only Scolecbythidae). Sampling within the Apoidea was particularly dense with 53 species sampled from 23 out of 25 recognized bee subfamilies, and 16 species from outside bees including the phylogenetically enigmatic families Ampulicidae and Heterogynaidae. We also included 14 species from four out of eight subfamilies within the paraphyletic family Crabronidae (29). For outgroup taxa, we sampled all superfamilies from within the sawfly grade (“Symphyta”), and 8 out of 12 non-aculeate superfamilies from within the Apocrita (“Parasitica”), including Trigonalioidea, Evanioidea, Ichneumonoidea, and Ceraphronoidea. Those taxa have been hypothesized in previous analyses as lineages closely related to Aculeata (15,32–34,37). To better compare results between the Johnson *et al.* (30) transcriptome

study and our UCE study, we sampled DNA from 7 out of 12 of the same specimen series that were sampled in Johnson *et al.* (30).

After sequencing of enriched samples, we used the PHYLUCE v1.5 software package (38) to clean and assemble raw reads; extract, align and trim UCE loci (for sequenced and genome-enabled taxa); filter loci for taxon completeness, and generate DNA matrices ready for phylogenetic analysis (see materials and methods for details). For all taxa that we enriched and sequenced, we recovered an average of 966 UCE contigs per sample, with a mean contig length of 801 bp and an average coverage per UCE contig of 80X (for complete assembly stats see supporting information S1, Table 4). For genome-enabled taxa, we recovered an average of 1,036 UCE loci. Using our set of UCE alignments for all taxa, we evaluated the effects of filtering alignments for various levels of taxon occupancy (% of taxa required to be present in a given locus) and selected the 75% filtered locus set (“*Hym-187T-F75*”) as the primary locus set for analysis. The *Hym-187T-F75* locus set included 854 loci and had an average locus length of 238 bp resulting in a concatenated data matrix of 203,095 bp of which 143,608 sites were phylogenetically informative (for all matrix stats see supporting information S1, table 5).

# *Phylogeny of Aculeata*

After filtering for taxon completeness, we carried out maximum likelihood (ML) and Bayesian (BI) analyses on the concatenated *Hym-187T-F75* matrix using RAXML v8.0.3 and EXABAYES v1.4.1 (39), respectively. For both approaches we partitioned the data



set using the kmeans algorithm available in a development version of PARTITIONFINDER (PF) (40), and for the ML searches we analyzed the matrix in several additional ways: (1) unpartitioned, (2) partitioned by locus, and (3) partitioned by the hcluster algorithm in PF v1.1.1 (data pre-partitioned by locus). We also ran three analyses using the summary method implemented in ASTRAL v4.8.0 for species tree estimation (41). For input into ASTRAL we generated bootstrapped gene trees for all loci using RAxML (200 reps). In the first analysis we used all individual gene trees and accompanying bootstrap trees as input into ASTRAL (854 loci total). In the second analysis we calculated and sorted loci by average bootstrap score (=informativeness) using R v3.2.2 (42) and we selected the 500 loci that had the highest scores for input into ASTRAL. We did this to reduce possible error/bias introduced by including uninformative loci, a problem that has been observed in other studies (43–45). For the third analysis we used all loci; however, to reduce error from loci with low information content we employed weighted statistical binning, which bins loci together based on shared statistical properties and then weights bins by the number of included loci (46) (details in electronic supporting material). We ran all species-tree analyses with 100 multi-locus bootstrap replicates (47).

To investigate other potential biases in our data, we carried out several additional analyses. In particular we wanted to address the observation that G+C variance can be a problem for reconstructing phylogeny in aculeate Hymenoptera (21). First, using PHYLUC, we converted the complete, concatenated matrix to RY coding and we performed a best tree plus rapid bootstrapping analysis (100 bootstrap replicates) in

RAXML using the BINGAMMA model of sequence evolution. Second, we filtered loci for various parameters calculated in R (scripts modified from (48)) and PHYLUC: average bootstrap score, % invariant sites (= rate of evolution), and G+C variance. We then removed the 10% of loci that had the highest values for GC variance, and the top 10% of loci that had the lowest values for bootstrap score and % invariant sites. Following removal of outlier loci we retained 636 alignments (“best636”), and we concatenated these into a single matrix and analyzed the matrix unpartitioned in RAXML (best tree searches with 100 rapid bootstrap replicates). We did not partition the data because partitioning had little effect in the analysis of the complete matrix.

Across analyses we recovered a robust phylogeny of the Aculeata (Fig 1 and electronic supporting information S2, figures 1-14), with the topology being identical for all ML and BI analyses of the complete, non-RY-coded data, and nearly identical for the ST analyses and the ML analysis of the complete, RY-coded data (we recovered several differences within Chrysidoidea, noted below).

We recovered the superfamily Trigonaloidea as sister to Aculeata in all analyses, and with maximum support except in the unbinned species tree analyses (97-98% support). Although we are missing several parasitoid superfamilies in our data set, this result is congruent with results from several recent molecular analyses (32,34,37), but is incongruent with results from (33). We did not recover the Ichneumonoidea, which has been a long-standing candidate as the sister group to the Aculeata (15), to be the sister group in any analysis. Within Aculeata, we recovered part of Chrysidoidea (cuckoo

wasps and relatives) as sister to the remaining superfamilies, with Chrysidoidea itself paraphyletic, forming a grade of two (ML and BI analyses), three (binned ST analysis), or four (unbinned ST analyses) clades, depending on the analysis. In the ML and BI analyses of the non-RY-coded data, the first clade included [Chrysididae+[Plumariidae+Bethylidae]] and the second clade included [Sclerogibbidae+[Embolemidae+Dryinidae]]. The placement of the second clade as sister to the remaining Aculeata, and the placement of Sclerogibbidae within the clade, received less than maximum bootstrap support in the ML analysis. In the analysis of the RY-coded data, we recovered a paraphyletic Chrysidoidea, but with only Sclerogibbidae falling outside of the superfamily. Results varied among the ST analyses, with the binned result being the same as in the non-RY-coded analyses except that Sclerogibbidae was placed outside of clade two and as sister to all remaining Aculeata. In the unbinned ST analyses the taxon *Plumarius* (Plumariidae) was moved out of the first clade mentioned above and placed as sister to Sclerogibbidae plus all other aculeates.

The remaining aculeate subfamilies separated into two major clades that were highly supported in all analyses. The first clade includes the superfamilies Vespoidea, Tiphioidea, Thynnoidea, and Pompiloidea, as well as the family Sierolomorphidae (currently in Tiphioidea). The monophyly of this group received maximum or nearly maximum support in all ML and BI analyses ( $\geq 98\%$ ), and slightly reduced support in the ST analyses ( $\geq 93\%$ ). Within the clade, we recovered a consistent topology across all analyses, with Vespoidea (includes Rhopalosomatidae and Vespidae) sister to the remaining superfamilies, and the phylogenetically enigmatic family Sierolomorphidae

240 sister to [Pompiloidea+[Tiphioidea+Thynnoidea]]. Relationships among superfamilies  
 241 received maximum support across analyses, except the monophyly of Vespoidea received  
 242 less than maximum support in the ML analysis of the *best636* data set (98%) and the  
 243 unbinned ST analyses ( $\geq 84\%$ ). Within Pompiloidea we recovered Pompilidae as sister to  
 244 [Sapygidae+[Myrmosidae+Mutilidae]], but support for the position of Myrmosidae was  
 245 less than maximum in all analyses except BI ( $\geq 57\%$ ), and support for the position of  
 246 Sapygidae was reduced in a few analyses ( $\geq 74\%$ ), suggesting uncertainty. The second  
 247 major clade contained the remaining aculeate superfamilies, with Scolioidea recovered as  
 248 sister to Formicoidea+Apoidea in all analyses. This result received maximum support in  
 249 all concatenated analyses. However, Scolioidea sister to Formicoidea+Apoidea received  
 250 somewhat lower support in ST analyses ( $\geq 96\%$ ), and Formicoidea+Apoidea received  
 251 90% support in the binned ST analysis and only 43% and 7% support in the 500 best and  
 252 all loci ST analyses. Overall, relationships among superfamilies largely agree with the  
 253 recent Johnson *et al.* transcriptome study (30), except for the placement of Vespoidea.  
 254  
 255 Within Apoidea (bees and apoid wasps), our results are completely consistent across  
 256 analyses and largely agree with Debevec *et al.* (29). We recovered Ampulicidae as sister  
 257 to remaining taxa, and we found Crabronidae to be paraphyletic with respect to  
 258 Sphecidae and bees. The remaining taxa formed a grade in the following order:  
 259 [Heterogynaidae+[Crabroninae+Sphecidae], Bembicini, Phemphredoninae+Philanthinae,  
 260 and the bees (Anthophila). The position of the enigmatic family Heterogynaidae as sister  
 261 to Crabroninae+Sphecidae is a novel result, receiving less than maximum support only in  
 262 the ST analyses (98% binned and  $\geq 32\%$  unbinned). The position of the bees as sister to

the Pemphredoninae+Philanthinae was first reported in Debevec *et al.* (29) and was also recovered here with maximum support in all analyses except unbinned ST analyses ( $\geq 89\%$ ).

Within bees, we recovered Melittidae to be sister to all remaining families, with maximum support in concatenated analyses ( $\geq 47\%$  in ST analyses), as found in several previous studies (22). The remaining families were divided into two major clades: [Megachilidae+Apidae] (i.e., “long-tongued” bees *sensu* Michener (18)), and [Andrenidae+[[Stenotritidae+Colletidae]+Halictidae]]. Relationships of subfamilies within all families are largely congruent with previous studies of bee higher-level relationships (49). Within Apidae we recovered a monophyletic “cleptoparasitic clade” (50), monophyly of Anthophorini, Xylocopinae (51), and a sister-group relationship between Centridini and corbiculates. Relationships within corbiculates were notable because we recovered monophyly of the eusocial corbiculate tribes (Apini+Bombini+Meliponini) in all analyses except the ST analyses, which placed Apini as sister to [Euglossini+[Bombini+Meliponini]] with less than maximum support.

### *Taxon Sampling Experiments*

To test the effects of taxon sampling on phylogenetic inference and to examine the incongruent placement of ants between previous phylogenomic studies (30,31), we created and analyzed a series of alternative taxon sets, which can be divided into three categories (Fig 2): (1) variations of Johnson *et al.* (30), (2) variations of Faircloth *et al.*

(31), and (3) variations of the current taxon set. For the first category, we generated two data sets, one with exactly the same taxon sampling as (30) (“*Johnson-19T*”), and one with the chrysidoid *Argochrysis armilla* removed (“*Johnson-18T*”). This particular manipulation was done because the major difference between the two phylogenomic studies was the presence/absence of Chrysidoidea, which is the sister taxon to the rest of Aculeata.

For the Faircloth *et al.* (31) manipulations we recreated the original 45 taxon matrix (“*Faircloth-45T*”) and then created several alternative taxon sets. First we added a single chrysidoid (“*Faircloth-46T*”), and then continued to add additional aculeates to balance the data set (“*Faircloth-52T*”, “*Faircloth-56T*” and “*Faircloth-61T*”). We also tried balancing the data set by removing most ant taxa from the original data set (“*Faircloth-26T*”) and adding in a chrysidoid (“*Faircloth-27T*”).

Finally, for the third category of taxon sampling experiments, we generated a data set with most outgroups removed (“*Hym-147T*”), leaving *Nasonia* as the earliest diverging outgroup and *Megaspilus* (Ceraphronoidea), Evanioidea, and Trigonaloidea as more recently diverging outgroups. From this taxon set, we removed chrysidoids (“*Hym-133T*”) and chrysidoids plus trigonaloids (“*Hym-131T*”). We also attempted to create the most balanced data set we could by removing excessive ant, bee and wasp taxa (“*Hym-100T*”). By removing distantly related outgroups, we not only reduced the number of taxa, but we potentially increased the average length of alignments. This is because UCE loci become more variable away from the central, core region (36) and alignment

trimming (see materials and methods) removes poorly aligned regions. Thus, by removing more distant outgroups, alignments should be improve at the flanks of loci and less data should be trimmed.

In our description of the results we focus on the placement of ants (Formicoidea) among the other major lineages (superfamilies, etc.) of Aculeata. Among taxon sets, we recovered three alternative topologies (Fig 2, Table 1, and electronic supporting information S2, Figs 18-30): (A) ants sister to Apoidea, (B) ants sister to all other groups, minus Chrysidoidea, and (C) ants sister to Apoidea plus Scolioidea. In both of the Johnson *et al.* matrices, we recovered topology A. However, when we removed the chrysidoid, bootstrap support values for the relationships among ants, Apoidea, Scolioidea, Vespoidea, and Tiphioidea+Pompiloidea were reduced from maximum to 89%. We found a similar result in the analyses of the *Hym-147T* matrix and variants. All three matrices (*Hym-147T*, *Hym-133T*, and *Hym-131T*) produced topology A, but when chrysidoids and trigonaloids were removed (*Hym-131T*), support for the positions of ants as sister to Scolioidea+Apoidea was lowered to 90%.

Analysis of the original Faircloth *et al.* (31) taxon set (*Faircloth-45T*) produced topology B, as in the original study. Adding a chrysidoid to the taxon set (*Faircloth-46T*) did not change the topology, but did reduce support for the position of ants slightly (99%). In the *Faircloth-52T* and *Faircloth-56T* analyses, we also recovered topology B. However, in the *Faircloth-61T* analyses the topology shifted to C, placing ants as sister to Scolioidea plus Apoidea. The difference between *Faircloth-56T* and *Faircloth-61T* was

the addition of several chrysidoids (Embolemidae and Dryinidae), Rhopalosomatidae (Vespoidea), and Ampulicidae (Apoidea), with the latter two taxa breaking long branches. Reducing and balancing the taxa of *Faircloth-45T* also altered the resulting topology. By reducing the number of ant taxa from 22 in *Faircloth-45T* to 3 taxa in *Faircloth-26T* the topology changed to A, but with only moderate support for Formicoidea+Apoidea (88%). Adding in a chrysidoid (*Faircloth-27T*) also resulted in topology A, and with nearly maximum bootstrap support for Formicoidea+Apoidea (97%).

Lastly, for the *Hym-100T* matrix, in which we reduced the number of ant and bee taxa to balance the larger taxon set, we recovered topology A, with the Formicoidea+Apoidea clade receiving maximum bootstrap support. All other relationships among superfamilies and within Apoidea were the same as those in the ML analysis of the *Hym-147T* and *Hym-187T* matrices.

### *Divergence Dating*

To generate a time tree for the evolution of the stinging wasps we estimated divergence dates for the complete 187 taxon matrix using the program BEAST v1.8.2 (52). We calibrated the analysis using 36 fossils representing taxa from across Hymenoptera and one secondary calibration taken from (53) for the root node (electronic supporting information S1, Table 3). For fossil ages we used midpoint dates taken from date ranges provided on the Fossilworks website (54) (<http://fossilworks.org/>). Due to computational



challenges with BEAST, arising from having both a large number of taxa and a large amount of sequence data, we made the analysis feasible by inputting a starting tree (all nodes constrained), turning off tree-search operators, and using only a subset of the sequence data set rather than the entire concatenated matrix (details in electronic supporting material). We performed three separate analyses to compare the effects of different sets of loci on the final, dated results: (1) 25 loci that had the highest gene-tree bootstrap scores, (2) 50 loci that had the highest gene-tree bootstrap scores, and (3) 50 randomly selected loci.

The analysis of the three different locus sets (25 best loci, 50 best loci, 50 random loci) returned completely congruent dates (Table 2 and electronic supporting information S2, Figs 15-17). Consequently, we report here just the dates from the analysis of 50 random loci (Fig 2 and electronic supporting information S2, Fig 17). We estimated an age of 257 Ma (240-274 Ma 95% HPD) for crown Hymenoptera and 200 Ma (187-216 Ma) for Euhymenoptera (Orussoidea+Apocrita). The Apocrita arose 194 Ma (181-208), followed by the Aculeata at 161 Ma (154-169 Ma). Within Aculeata all of the superfamilies originated between 161 Ma to 100 Ma. The ants, minus the earliest diverging subfamilies Leptanillinae and Martialinae (not sampled in the current study), arose at least 118 Ma (108-128 Ma; Amblyoponinae+formicoid clade). The Apoidea arose 131 Ma (121-141 Ma), followed by the bees at 100 Ma (92-107 Ma).

## Discussion

The coupling of next-generation sequencing with reduced representation phylogenomics has driven a revolution in molecular systematics, making it possible to generate genome-scale data sets for hundreds of taxa at a fraction of the cost of traditional methods (12,13,55). Here, we further applied one of the most promising approaches, the target enrichment of ultraconserved elements (UCEs) (36), to the megadiverse insect order Hymenoptera, greatly extending a previous study which first introduced this approach in insects (31). We focused on family-level relationships of the stinging wasps (Aculeata) and produced a robust backbone phylogeny that confirms the utility of the UCE approach in Hymenoptera. In addition, by carrying out a series of taxon sampling experiments, we have demonstrated that even in the era of phylogenomics, careful taxon sampling and the use of taxon inclusion/exclusion experiments can be of critical importance.

Our phylogenomic results for Aculeata are largely consistent with and significantly amplify two previous molecular studies that employed traditional Sanger sequencing methods (28,29), and one recent transcriptome-based study (30). Compared to the two Sanger-based efforts, which both included a more limited number of taxa, our results agree in terms of the composition of superfamilies and families, with the only differences among studies being our finding that Chrysidoidea is paraphyletic and that the enigmatic family Sierolomorphidae is sister to [Pompiloidea+[Tiphioidea+Thynnoidea]]. The latter result supports resurrecting the superfamily Sierolomorphoidea, originally proposed by (56). Relationships among superfamilies, however, are quite different among these two studies, and our results mostly agree with those reported in the transcriptome study by Johnson *et al.* (30). An exception is the placement of Vespoidea in our study as sister to

[Sierolomorphidae+[[Tiphioidea+Thynnoidea]+Pompiloidea]]]. This novel result is possibly due to our more extensive taxon sampling within Vespoidea (inclusion of Rhopalosomatidae) as compared to (30).

Our results strengthen previous findings of relationships within the Apoidea (29) and within the bees (Anthophila) (49). We confirm placement of Ampulicidae as sister to remaining Apoidea and the bees as sister to the crabronid subfamilies Philanthinae+Pemphredoninae. However, future studies should include an even broader sampling of Pemphredoninae and Philanthinae to confirm this hypothesis. Novel to our study is the placement of Heterogynaidae as sister to Crabroninae+Sphecidae. This taxon was previously placed as either sister to Apoidea (inside Ampulicidae) (29), sister to Astatinae+Bembicini (29), or sister to Philanthinae+Anthophila (57).

Within bees, our results provide further confirmation that the family Melittidae, previously thought to be sister to the long-tongued bees based on morphology (58), is monophyletic and sister to remaining bee families. It is also notable that most of our analyses recovered the eusocial corbiculate bees as monophyletic and sister to the weakly social Euglossini, thus favoring a single origin of eusociality within the group. Relationships among these taxa have been controversial, but our result agrees with a recent phylogenomic study that found that controlling for base-compositional heterogeneity, specifically GC variance among taxa, favored monophyly of eusocial corbiculates (21). The fact that we recovered this result without controlling for base

compositional bias suggests that our UCE loci are robust to this problem, as was also suggested in another study of mammalian relationships (59).

Of major importance for understanding the evolution of eusociality, is our strongly supported result that Formicoidea (the ants) is sister to Apoidea (apoid wasps and bees). While disagreeing with the previous UCE study (31), it is in full agreement with the transcriptome study (30). The reason for the earlier conflict between these sources of phylogenomic data appears to be due to taxon sampling, with the earlier UCE study missing a key outgroup (Chrysidoidea) and having an excessive number of ant taxa (note that these were included intentionally to test the UCE method at resolving deep and shallow divergences), making the data set unbalanced. By conducting a series of taxon sampling experiments we demonstrated that excluding Chrysidoidea (or Chrysidoidea and Trigonalaoidea) reduced bootstrap support for ants being sister to Apoidea. We also found that by either removing the disproportionate numbers of ant taxa, or adding additional taxa to the Faircloth *et al.* (31) taxon set, we were able to infer a topology consistent with both the transcriptome study and our more comprehensive taxon set presented here. Although the placement of ants as sister to Apoidea should still receive further investigation, we believe this result is the preferred one given its robustness across all of our analyses (ML, BI, and ST). Moreover, as discussed in Johnson *et al.* (30), the result is biologically attractive given that Apoidea includes the greatest number of eusocial Hymenoptera and all ants are eusocial. Furthermore, the finding that both bootstrap support and topology were affected by taxon sampling, provides additional evidence that taxon sampling in phylogenetics should still be a major concern, even in the

age of phylogenomics, when data are no longer a limiting variable. Overcoming this challenge will require expanded and informed taxon selection as well as improved models and computational methods that can handle genome-scale data sets.

## **Materials and Methods**

### *UCE Sequencing Pipeline*

For all newly sampled taxa, we extracted DNA using Qiagen DNeasy Blood and Tissue kits (Qiagen Inc., Valencia, CA) and we fragmented up to 500 ng of input DNA to an average fragment distribution of 400-600 bp using a Qsonica Q800R sonicator (Qsonica LLC, Newton, CT). Following sonication, we constructed sequencing libraries using Kapa library preparation kits (Kapa Biosystems Inc., Wilmington, MA) and custom sample barcodes (60). We assessed success of library preparation following PCR amplification by measuring DNA concentration and visualizing libraries on an agarose gel. We purified reactions following PCR using 0.8 to 1.0X AMPure substitute (61).

For UCE enrichment we pooled 6–10 libraries together at equimolar concentrations and adjusted pool concentrations to 147 ng/μl. For each enrichment we used a total of 500 ng of DNA (3.4 μl each pool), and we performed enrichments using a custom RNA bait library developed for Hymenoptera (31) and synthesized by MYcroarray (MYcroarray, Ann Arbor, MI). The probe set includes 2,749 probes, targeting 1,510 UCE loci. We hybridized RNA bait libraries to sequencing libraries at 65°C for a period of 24 hours,

and we enriched each pool following a standardized protocol (version 1.5; protocol available from <http://ultraconserved.org>).

We verified enrichment success with qPCR (ViiA 7, Applied Biosystems, Waltham MA) by comparing amplification profiles of unenriched to enriched pools using PCR primers designed from several UCE loci. After verification, we used qPCR to measure the DNA concentration of each pool, and we combined all pools together at equimolar ratios to produce a final pool-of-pools. To remove overly large and small fragments, we size-selected the final pools to a range of 300–800 bp using a Blue Pippin size selection instrument (Sage Science, Beverly, MA). We mailed size-selected pools to either the UCLA Neuroscience Genomics Core or the Cornell University Biotechnology Resource Center (<http://www.biotech.cornell.edu/brc/genomics-facility>), where the samples were quality checked on a Bioanalyzer (Agilent Technologies, Santa Clara, CA), quantified with qPCR, and sequenced on an Illumina HiSeq 2500 (2x150 Rapid Run; Illumina Inc, San Diego, CA).

#### *Matrix Assembly*

The sequencing facilities demultiplexed and converted raw data from BCL to FASTQ format using either BASESPACE or BCL2FASTQ (available at [http:// support. illumina. com/ downloads/ bcl2fastq\\_ conversion\\_ software\\_ 184. html](http://support.illumina.com/downloads/bcl2fastq_conversion_software_184.html)). Using these files, we cleaned and trimmed raw reads using ILLUMIPROCESSOR (62), which is a wrapper program around TRIMMOMATIC (63,64). We performed all initial bioinformatics steps, including read cleaning, assembly, and alignment, using the software package

PHYLUCE v1.5. For sequenced samples, we assembled reads *de novo* using a wrapper script around TRINITY v2013-02-25 (65). After assembly, we used PHYLUCE to identify individual UCE loci from the bulk of assembled contigs while removing potential paralogs. We then used PHYLUCE to combine the UCE contigs from the sequenced taxa with the contigs from the 32 genome-enabled taxa into a single FASTA file. We aligned all loci individually using a wrapper around MAFFT v7.130b (66), and we trimmed the alignments using a wrapper around GBLOCKS v0.91b (67,68), which we ran with reduced stringency settings (0.5, 0.5, 12, and 7 for b1–4 settings, respectively).

To extract an equivalent set of UCE loci from 32 genome-enabled taxa, we downloaded Hymenoptera genomes from NCBI and the Hymenoptera Genome Database (69). The genome of *Apterognya* za01 was provided by the authors of Johnson *et al.* (30). Using the software package PHYLUCE v1.5 (36,38), we aligned our UCE probe sequences to each genome and then sliced out matching sequence along with 400 bp of flanking DNA on either side (*i.e.*, 180 bp target plus 800 bp total flanking sequence). We then used the resulting UCE “contigs” for input into the downstream bioinformatics and matrix assembly steps.

### *Analytical Details for Phylogenomic Inference*

We investigated the tradeoff between taxon occupancy and locus occupancy (=missing data) in order to select a set of loci to be used for all remaining analyses. Using PHYLUCE, we filtered the entire set of trimmed alignments for different amounts of

taxon completeness (% of taxa that must be included in a given alignment for it to be retained). This resulted in six locus sets filtered at a taxon threshold of 0, 25, 50, 75, 90, and 95% taxon completeness. To evaluate these locus sets we generated concatenated matrices and inferred maximum likelihood trees in RAXML v8.0.3 (70) (best tree search plus 100 rapid bootstrap replicates, GTR+ $\Gamma$  model of sequence evolution). We selected the best locus set by considering matrix completeness (more complete is better), topological consistency, and bootstrap support values (higher support is better). Using these criteria, we selected the 75% filtered set of alignments as the primary locus set for all subsequent analyses (electronic supporting information S1, Table 5; and S2, Figs 7-11).

All maximum likelihood (ML) analyses were performed using the best-tree plus rapid bootstrapping search (“-f a” option) in RAXML with 200 bootstrap reps for the kmeans analysis and 100 for all others. We used the GTR+ $\Gamma$  model of sequence evolution for all analyses (best tree and bootstrap searches). For the partitioned-Bayesian inference (BI) search, we executed two independent runs, each with four coupled chains (one cold and three heated chains). We linked branch lengths across partitions, and we ran each partitioned search for one million generations. We assessed burn-in, convergence among runs, and run performance by examining parameter files with the program TRACER v1.6.0 (71). We computed consensus trees using the *consense* utility, which comes as part of EXABAYES.



To carry out the weighted statistical binning ASTRAL analysis, we input all gene trees into the statistical binning pipeline using a support threshold of 75 (recommended for data sets with < 1000 loci). This grouped genes into 103 bins, comprising 73 bins of 8 loci and 30 bins of 9 loci. After binning we concatenated the genes into supergenes and used RAXML to infer supergene trees with bootstrap support (200 reps). We then input the resulting best trees, weighted by gene number, and the bootstrap trees, into ASTRAL and conducted a species tree analysis with 100 multi-locus bootstrap replicates (47).

For each taxon sampling experiment, we realigned the data after removing taxa, filtered alignments with GBLOCKS, filtered alignments for taxon completeness (using a 75% threshold), and generated a new concatenated matrix. We then analyzed each matrix in RAXML using a best tree plus rapid bootstrap search (100 replicates) with GTR+ $\Gamma$  as the model of sequence evolution.

As the input topology for the BEAST analyses, we used the best tree generated from the kmeans partitioned RAXML search of all loci. For each analysis, we concatenated the loci and analyzed the matrix without partitioning. We performed a total of four independent runs per analysis in BEAST, with each run progressing for 200 million generations, sampling every 1,000 generations. We also performed one search with the data removed so that the MCMC sampled from the prior distribution only. For the clock and substitution models, we selected uncorrelated lognormal and GTR+ $\Gamma$ , respectively. For the tree prior, we used a birth-death model, and for the ucl.d.mean prior, we used an

exponential distribution with the mean set to 1.0 and the initial value set to 0.003  
(determined empirically from preliminary runs).

## Acknowledgements

We would like to thank Dave Smith for donating specimens. We thank Jeffrey Sosa-Calvo, Ana Jesovnik, and Mike Lloyd for assistance with lab work. For sequencing we thank Joe DeYoung at the UCLA Neurosciences Genomics Core and Peter Schweitzer at the Cornell Genomics Facility. Lab work for this study was conducted at the Smithsonian NMNH Laboratory of Analytical Biology (LAB) and phylogenetic analyses were performed using the Smithsonian's High-Performance Computer Cluster (Hydra) and the CIPRES Science Gateway. We thank X anonymous reviewers for helpful suggestions to the manuscript. Mention of trade names or commercial products in this publication is solely for the purpose of providing specific information and does not imply recommendation or endorsement by the USDA. USDA is an equal opportunity provider and employer.

## References

1. Nabhan AR, Sarkar IN. The impact of taxon sampling on phylogenetic inference: a review of two decades of controversy. *Brief Bioinform.* 2012;13(1):122–134. doi: 10.1093/bib/bbr014
2. Townsend JP, Lopez-Giraldez F. Optimal selection of gene and ingroup taxon

- 582           sampling for resolving phylogenetic relationships. *Syst Biol.* 2010;59(4):446–457.  
583           doi: 10.1093/sysbio/syq025
- 584    3.    Heath TA, Hedtke SM, Hillis DM. Taxon sampling and the accuracy of  
585           phylogenetic analyses. *J Syst Evol.* 2008;46(3):239–257. doi:  
586           10.3724/SP.J.1002.2008.08016
- 587    4.    Zwickl DJ, Hillis DM. Increased taxon sampling greatly reduces phylogenetic  
588           error. *Syst Biol.* 2002;51(4):588–98. doi: 10.1080/10635150290102339
- 589    5.    Hillis DM, Pollock DD, McGuire JA, Zwickl DJ. Is sparse taxon sampling a  
590           problem for phylogenetic inference? *Syst Biol.* 2003;52(1):124–126. doi:  
591           10.1080/10635150390132911
- 592    6.    Pollock DD, Zwickl DJ, McGuire JA, Hillis DM. Increased taxon sampling is  
593           advantageous for phylogenetic inference. *Syst Biol.* 2002;51(4):664–671. doi:  
594           10.1080/10635150290102357
- 595    7.    Pick KS, Philippe H, Schreiber F, Erpenbeck D, Jackson DJ, Wrede P, et al.  
596           Improved phylogenomic taxon sampling noticeably affects nonbilaterian  
597           relationships. *Mol Biol Evol.* 2010;27(9):1983–1987. doi:  
598           10.1093/molbev/msq089
- 599    8.    Rosenberg MS, Kumar S. Incomplete taxon sampling is not a problem for  
600           phylogenetic inference. *Proc Natl Acad Sci.* 2001;98(19):10751–10756. doi:  
601           10.1073/pnas.191248498
- 602    9.    Graybeal A. Is it better to add taxa or characters to a difficult phylogenetic  
603           problem? *Syst Biol.* 1998;47(1):9–17. doi: 10.1080/106351598260996
- 604    10.   Jansen RK, Kaittanis C, Saski C, Lee S-B, Tomkins J, Alverson AJ, et al.

605 Phylogenetic analyses of Vitis (Vitaceae) based on complete chloroplast genome  
606 sequences: effects of taxon sampling and phylogenetic methods on resolving  
607 relationships among rosids. BMC Evol Biol. 2006;6:32. doi: 10.1186/1471-2148-  
608 6-32

609 11. Prum RO, Berv JS, Dornburg A, Field DJ, Townsend JP, Lemmon EM, et al. A  
610 comprehensive phylogeny of birds (Aves) using targeted next-generation DNA  
611 sequencing. 2015;526:569-573. doi: 10.1038/nature15697

612 12. McCormack JE, Hird SM, Zellmer AJ, Carstens BC, Brumfield RT. Applications  
613 of next-generation sequencing to phylogeography and phylogenetics. Mol  
614 Phylogenet Evol. 2013;66(2):526–538. doi: 10.1016/j.ympev.2011.12.007

615 13. Lemmon EM, Lemmon AR. High-throughput genomic data in systematics and  
616 phylogenetics. Annu Rev Ecol Evol Syst. 2013;44(1):19.1–19.23. doi:  
617 10.1146/annurev-ecolsys-110512-135822

618 14. Grimaldi D, Engel MS. Evolution of the Insects. New York: Cambridge University  
619 Press; 2005.

620 15. Sharkey MJ. Phylogeny and classification of Hymenoptera. Zootaxa.  
621 2007;548:521–48.

622 16. Stork NE. Measuring global biodiversity and its decline. In: Reaka-Kudla ML,  
623 Wilson DE, Wilson EO, editors. Biodiversity II: Understanding and Protecting Our  
624 Biological Resources. Washington, D.C.: Joseph Henry Press; 1996. p. 41–68.

625 17. Hölldobler B, Wilson EO. The Ants. Cambridge: Belknap Press; 1990.

626 18. Michener CD. The Bees of the World. 2nd ed. Baltimore: The Johns Hopkins  
627 University Press; 2007.

- 628 19. Hunt JH. The Evolution of Social Wasps. New York: Oxford University Press;  
629 2007.
- 630 20. Bradley TJ, Briscoe AD, Brady SG, Contreras HL, Danforth BN, Dudley R, et al.  
631 Episodes in insect evolution. Integr Comp Biol. 2009;49(5):590–606. doi:  
632 10.1093/icb/icp043
- 633 21. Romiguier J, Cameron SA, Woodard SH, Fischman BJ, Keller L, Praz CJ.  
634 Phylogenomics controlling for base compositional bias reveals a single origin of  
635 eusociality in corbiculate bees. Mol Biol Evol. 2015;33(3):670–678.
- 636 22. Danforth BN, Cardinal S, Praz C, Almeida EAB, Michez D. The impact of  
637 molecular data on our understanding of bee phylogeny and evolution. Annu Rev  
638 Entomol. 2013;58(1):57–78. doi: 10.1093/icb/icp043
- 639 23. Schwarz MP, Bull NJ, Cooper SJB. Molecular phylogenetics of allodapine bees,  
640 with implications for the evolution of sociality and progressive rearing. Syst Biol.  
641 2003;52(1):1–14. doi: 10.1080/10635150390132632
- 642 24. Gibbs J, Brady SG, Kanda K, Danforth BN. Phylogeny of halictine bees supports a  
643 shared origin of eusociality for *Halictus* and *Lasioglossum* (Apoidea: Anthophila:  
644 Halictidae). Mol Phylogenet Evol. 2012;65(3):926–39. doi:  
645 10.1016/j.ympev.2012.08.013
- 646 25. Hines HM, Hunt JH, O'Connor TK, Gillespie JJ, Cameron SA. Multigene  
647 phylogeny reveals eusociality evolved twice in vespid wasps. Proc Natl Acad Sci.  
648 2007;104(9):3295–3299. doi: 10.1073/pnas.0610140104
- 649 26. O'Neil KM. Solitary Wasps: Behavior and Natural History. Ithaca: Cornell  
650 University Press; 2001.

- 651 27. Evans HE. Predatory wasps. *Sci Am.* 1963;208(4):144–55.
- 652 28. Pilgrim EM, von Dohlen CD, Pitts JP. Molecular phylogenetics of Vespoidea  
653 indicate paraphyly of the superfamily and novel relationships of its component  
654 families and subfamilies. *Zool Scr.* 2008;37(5):539–60. doi: 10.1111/j.1463-  
655 6409.2008.00340.x
- 656 29. Debevec AH, Cardinal S, Danforth BN. Identifying the sister group to the bees: a  
657 molecular phylogeny of Aculeata with an emphasis on the superfamily Apoidea.  
658 *Zool Scr.* 2012;41(5):527–535. doi: 10.1111/j.1463-6409.2012.00549.x
- 659 30. Johnson BR, Borowiec ML, Chiu JC, Lee EK, Atallah J, Ward PS. Phylogenomics  
660 resolves evolutionary relationships among ants, bees, and wasps. *Curr Biol.*  
661 2013;23:1–5. doi: 10.1016/j.cub.2013.08.050
- 662 31. Faircloth BC, Branstetter MG, White ND, Brady SG. Target enrichment of  
663 ultraconserved elements from arthropods provides a genomic perspective on  
664 relationships among Hymenoptera. *Mol Ecol Resour.* 2015;15:489–501. doi:  
665 10.1111/1755-0998.12328
- 666 32. Heraty J, Ronquist F, Carpenter JM, Hawks D, Schulmeister S, Dowling AP, et al.  
667 Evolution of the hymenopteran megara diation. *Mol Phylogenet Evol.*  
668 2011;60(1):73–88. doi: 10.1016/j.ympev.2011.04.003
- 669 33. Sharkey MJ, Carpenter JM, Vilhelmsen L, Heraty J, Liljeblad J, Dowling APG, et  
670 al. Phylogenetic relationships among superfamilies of Hymenoptera. *Cladistics.*  
671 2012;28(1):80–112. doi: 10.1111/j.1096-0031.2011.00366.x
- 672 34. Klopstein S, Vilhelmsen L, Heraty JM, Sharkey M, Ronquist F. The  
673 hymenopteran tree of life: evidence from protein-coding genes and objectively

aligned ribosomal data. PLoS One. 2013;8(8):e69344. doi:  
10.1371/journal.pone.0069344

35. Mao M, Gibson T, Dowton M. Higher-level phylogeny of the Hymenoptera  
inferred from mitochondrial genomes. Mol Phylogenet Evol. 2015;84:34–43. doi:  
10.1016/j.ympev.2014.12.009

36. Faircloth BC, McCormack JE, Crawford NG, Harvey MG, Brumfield RT, Glenn  
TC. Ultraconserved elements anchor thousands of genetic markers spanning  
multiple evolutionary timescales. Syst Biol. 2012;61(5):717–726. doi:  
10.1093/sysbio/sys004

37. Castro LR, Dowton M. Molecular analyses of the Apocrita (Insecta: Hymenoptera)  
suggest that the Chalcidoidea are sister to the diaprioid complex. Invertebr Syst.  
2006;20(5):603–14. doi: 10.1071/IS06002

38. Faircloth BC. PHYLUCE is a software package for the analysis of conserved  
genomic loci. Bioinformatics. 2015:Advance Access:1–3. doi:  
10.1093/bioinformatics/btv646

39. Aberer AJ, Kobert K, Stamatakis A. ExaBayes: massively parallel Bayesian tree  
inference for the whole-genome era. Mol Biol Evol. 2014;31(10):2553–2556. doi:  
10.1093/molbev/msu236

40. Frandsen PB, Calcott B, Mayer C, Lanfear R. Automatic selection of partitioning  
schemes for phylogenetic analyses using iterative k-means clustering of site rates.  
BMC Evol Biol. 2015;15:13. doi: 10.1186/s12862-015-0283-7

41. Mirarab S, Reaz R, Bayzid MS, Zimmermann T, Swenson MS, Warnow T.  
ASTRAL: genome-scale coalescent-based species tree estimation. Bioinformatics.

2014;30:i541–i548. doi: 10.1093/bioinformatics/btu462

42. Team RC. R: A language and environment for statistical computing. Vienna: R Foundation for Statistical Computing; 2015. Available from: <https://www.r-project.org/>

43. Meiklejohn KA, Faircloth BC, Glenn, Travis C, Kimball RT, Braun EL. Analysis of a rapid evolutionary radiation using ultraconserved elements (UCEs): evidence for a bias in some multispecies coalescent methods. *Syst Biol.* 2016;65(4):612-627. doi: 10.1093/sysbio/syw014

44. Hosner PA, Faircloth BC, Glenn TC, Braun EL, Kimball RT. Avoiding missing data biases in phylogenomic inference: an empirical study in the landfowl (Aves: Galliformes). *Mol Biol Evol.* 2015;33(4):1110–1125. doi: 10.1093/molbev/msv347

45. Manthey JD. Comparison of target-capture and restriction-site associated DNA sequencing for phylogenomics: a test in cardinalid tanagers (Aves, Genus: *Piranga*). *Syst Biol.* 2016;65(4):640–650. doi: 10.1017/CBO9781107415324.004

46. Bayzid MS, Mirarab S, Boussau B, Warnow T. Weighted statistical binning: enabling statistically consistent genome-scale phylogenetic analyses. *PLoS One.* 2015;10(6):e0129183. doi: 10.1371/journal.pone.0129183

47. Seo TK. Calculating bootstrap probabilities of phylogeny using multilocus sequence data. *Mol Biol Evol.* 2008;25(5):960–971. doi: 10.1093/molbev/msn043

48. Borowiec ML, Lee EK, Chiu JC, Plachetzki DC. Extracting phylogenetic signal and accounting for bias in whole-genome data sets supports the Ctenophora as sister to remaining Metazoa. 2015;16:987. doi: 10.1186/s12864-015-2146-4



- 720 49. Danforth BN, Cardinal S, Praz C, Almeida EAB, Michez D. The impact of  
721 molecular data on our understanding of bee phylogeny and evolution. *Annu Rev*  
722 *Entomol.* 2013;58:57–78. doi: 10.1146/annurev-ento-120811-153633
- 723 50. Cardinal S, Straka J, Danforth BN. Comprehensive phylogeny of apid bees reveals  
724 the evolutionary origins and antiquity of cleptoparasitism. *Proc Natl Acad Sci.*  
725 2010;107(37):16207–16211. doi: 10.1073/pnas.1006299107
- 726 51. Rehan SM, Leys R, Schwarz MP. First evidence for a massive extinction event  
727 affecting bees close to the KT boundary. *PLoS One.* 2013;8(10):e76683. doi:  
728 10.1371/journal.pone.0076683
- 729 52. Drummond AJ, Suchard MA, Xie D, Rambaut A. Bayesian phylogenetics with  
730 BEAUti and the BEAST 1.7. *Mol Biol Evol.* 2012;29(8):1969–73. doi:  
731 10.1093/molbev/mss075
- 732 53. Zhang C, Stadler T, Klopstein S, Heath TA, Ronquist F. Total-evidence dating  
733 under the fossilized birth-death process. *Syst Biol.* 2015;65(2):228–249. doi:  
734 10.1093/sysbio/syv080
- 735 54. Alroy J. Fossilworks. Gateway to the paleobiology database. 2015. Available:  
736 [www.fossilworks.org](http://www.fossilworks.org).
- 737 55. McCormack JE, Faircloth BC. Next-generation phylogenetics takes root. *Mol*  
738 *Ecol.* 2013;22:19–21. doi: 10.1111/mec.12050
- 739 56. Brothres DJ, Carpenter JM. Phylogeny of Aculeata: Chrysidoidea and Vespoidea  
740 (Hymenoptera). *J Hymenopt Res.* 1993;2(1):227–304.
- 741 57. Ohl M, Bleidorn C. The phylogenetic position of the enigmatic wasp family  
742 Heterogynaidae based on molecular data, with description of a new, nocturnal

743 species (Hymenoptera: Apoidea). Syst Entomol. 2005;31(2):321–337. doi:  
744 10.1111/j.1365-3113.2005.00313.x

745 58. Roig-Alsina A, Michener CD. Studies of the phylogeny and classification of long-  
746 tongued bees (Hymenoptera: Apoidea). Univ Kansas Sci Bull. 1993;55(13):124–  
747 62.

748 59. Romiguier J, Ranwez V, Delsuc F, Galtier N, Douzery EJP. Less is more in  
749 mammalian phylogenomics: AT-rich genes minimize tree conflicts and unravel the  
750 root of placental mammals. Mol Biol Evol. 2013;30(9):2134–44. doi:  
751 10.1093/molbev/mst116

752 60. Faircloth BC, Glenn TC. Not all sequence tags are created equal: designing and  
753 validating sequence identification tags robust to indels. PLoS One.  
754 2012;7(8):e42543. doi: 10.1371/journal.pone.0042543

755 61. Rohland N, Reich D. Cost-effective, high-throughput DNA sequencing libraries  
756 for multiplexed target capture. Genome Res. 2012;22(5):939–946. doi:  
757 10.1101/gr.128124.111

758 62. Faircloth BC. Illumiprocessor: a trimmomatic wrapper for parallel adapter and  
759 quality trimming. 2013. Available: <http://dx.doi.org/10.6079/J9ILL>.

760 63. Lohse M, Bolger AM, Nagel A, Fernie AR, Lunn JE, Stitt M, et al. RobiNA: A  
761 user-friendly, integrated software solution for RNA-Seq-based transcriptomics.  
762 Nucleic Acids Res. 2012;40(W1):W622–W627. doi: 10.1093/nar/gks540

763 64. Del Fabbro C, Scalabrin S, Morgante M, Giorgi FM. An extensive evaluation of  
764 read trimming effects on illumina NGS data analysis. PLoS One.  
765 2013;8(12):e85024. doi: 1. Del Fabbro C, Scalabrin S, Morgante M, Giorgi FM.

766 An extensive evaluation of read trimming effects on illumina NGS data analysis.  
767 PLoS One. 2013;8(12):e85024.

768 65. Grabherr MG, Haas BJ, Yassour M, Levin JZ, Thompson DA, Amit I, et al. Full-  
769 length transcriptome assembly from RNA-Seq data without a reference genome.  
770 Nat Biotechnol. 2011;29(7):644–652. doi: 10.1038/nbt.1883

771 66. Katoh K, Misawa K, Kuma K, Miyata T. MAFFT: a novel method for rapid  
772 multiple sequence alignment based on fast Fourier transform. Nucleic Acids Res.  
773 2002;30(14):3059–3066. doi: 10.1093/nar/gkf436

774 67. Castresana J. Selection of conserved blocks from multiple alignments for their use  
775 in phylogenetic analysis. Mol Biol Evol. 2000;17(4):540–552. doi:  
776 10.1093/oxfordjournals.molbev.a026334

777 68. Talavera G, Castresana J. Improvement of phylogenies after removing divergent  
778 and ambiguously aligned blocks from protein sequence alignments. Syst Biol.  
779 2007;56(4):564–77. doi: 10.1080/10635150701472164

780 69. Munoz-Torres MC, Reese JT, Childers CP, Bennett AK, Sundaram JP, Childs KL,  
781 et al. Hymenoptera Genome Database: integrated community resources for insect  
782 species of the order Hymenoptera. Nucleic Acids Res. 2011;39(Database  
783 issue):D658–D662. doi: 10.1093/nar/gkq1145

784 70. Stamatakis A. RAxML version 8: A tool for phylogenetic analysis and post-  
785 analysis of large phylogenies. Bioinformatics. 2014;30(9):1312–1313. doi:  
786 10.1093/bioinformatics/btu033

787 71. Rambaut A, Suchard MA, Xie D, Drummond AJ. Tracer v1.6, Available:  
788 <http://beast.bio.ed.ac.uk/Tracer>. 2014.

789

## 790 **Figure Captions**

791 **Fig 1.** Dated phylogeny of Hymenoptera. We inferred the topology by analyzing the  
792 *Hym-187T-F75* matrix in RAxML (partitioned by kmeans algorithm; 854 loci; 203,095  
793 bp of sequence data) and estimated the dates in BEAST (50 random loci; fixed topology;  
794 38 calibration points). Black dots indicate nodes that received < 100% bootstrap support  
795 in the ML analysis.

796

797 **Fig 2.** Alternative hypotheses for relationships among aculeate superfamilies. (A)  
798 Topology from Johnson *et al.* (30). (B) Topology from Faircloth *et al.* (31). (C) Topology  
799 from the *Faircloth-61T* matrix analyzed in this study. (D) Preferred topology inferred in  
800 this study (includes Sierolomorphaidea). Topologies correspond to those reported in  
801 Table 1, except that topologies A and D are equivalent in terms of ants being sister to  
802 Apoidea.

## 803 Tables

804 **Table 1.** Results of the taxon inclusion/exclusion experiments as evidenced by  
 805 topological and bootstrap support differences. The results suggest that both outgroup  
 806 choice (chrysidoid presence/absence) and taxon evenness are important. The matrix name  
 807 indicates whether the taxon set is a version of Johnson *et al.* (30), Faircloth *et al.* (31), or  
 808 this study (“Hym”). Three different topologies were recovered: (A) ants sister to  
 809 Apoidea; (B) ants sister to all other aculeate superfamilies, except Chrysidoidea; and (C)  
 810 ants sister to Apoidea+Scoliodea. Bootstrap support indicates support for the clade that  
 811 includes ants plus its sister group. Topologies correspond to those shown in Figure 1A-C,  
 812 with regard to the position of ants.

| Matrix Name   | Topology | BS Support<br>(Ants+Sister Group) | Outgroup                        | Note                       |
|---------------|----------|-----------------------------------|---------------------------------|----------------------------|
| Johnson-18T   | A        | 89                                | No chrysidoid                   |                            |
| Johnson-19T   | A        | 100                               |                                 | Same taxon set as in (30). |
| Faircloth-26T | A        | 88                                | No chrysidoid                   |                            |
| Faircloth-27T | A        | 97                                |                                 |                            |
| Faircloth-45T | B        | 100                               | No chrysidoid                   | Same taxon set as in (31). |
| Faircloth-46T | B        | 99                                |                                 |                            |
| Faircloth-52T | B        | 98                                |                                 |                            |
| Faircloth-56T | B        | 100                               |                                 |                            |
| Faircloth-61T | C        | 100                               |                                 |                            |
| Hym-100T      | A        | 100                               |                                 | Most balanced taxon set.   |
| Hym-131T      | A        | 90                                | No chrysidoid<br>or trigonaloid |                            |
| Hym-133T      | A        | 100                               | No chrysidoid                   |                            |
| Hym-147T      | A        | 100                               |                                 |                            |
| Hym-187T-F75  | A        | 100                               |                                 | This study.                |

813 **Table 2.** Divergence dates for key nodes (estimated with BEAST) comparing the 25 and  
814 50 best loci (best equals loci with highest average gene-tree support values), and 50  
815 randomly selected loci. Dates are given as median ages in millions of years ago (Ma),  
816 with the 95% highest posterior density given in parentheses.

| Select Clades (Crown Group)                         | 25 Best Loci<br>(Ma) | 50 Best Loci<br>(Ma) | 50 Random Loci<br>(Ma) |
|-----------------------------------------------------|----------------------|----------------------|------------------------|
| Hymenoptera                                         | 255 (238-272)        | 256 (239-273)        | 257 (240-274)          |
| Euhymenoptera                                       | 200 (187-215)        | 198 (186-213)        | 200 (187-216)          |
| Apocrita                                            | 193 (180-206)        | 192 (180-205)        | 194 (181-208)          |
| Aculeata (stinging Hymenoptera)                     | 162 (155-170)        | 162 (155-169)        | 161 (154-169)          |
| Apoidea+Formicoidea                                 | 144 (143-148)        | 145 (143-148)        | 145 (143-148)          |
| Formicidae (ants, w/o<br>Leptanillinae/Martialinae) | 119 (109-128)        | 118 (110-126)        | 118 (108-128)          |
| Apoidea (apoid wasps+bees)                          | 136 (127-144)        | 134 (123-142)        | 131 (121-141)          |
| Anthophila (bees)                                   | 102 (95-111)         | 102 (94-111)         | 100 (92-107)           |

# Figures

## Fig 1.

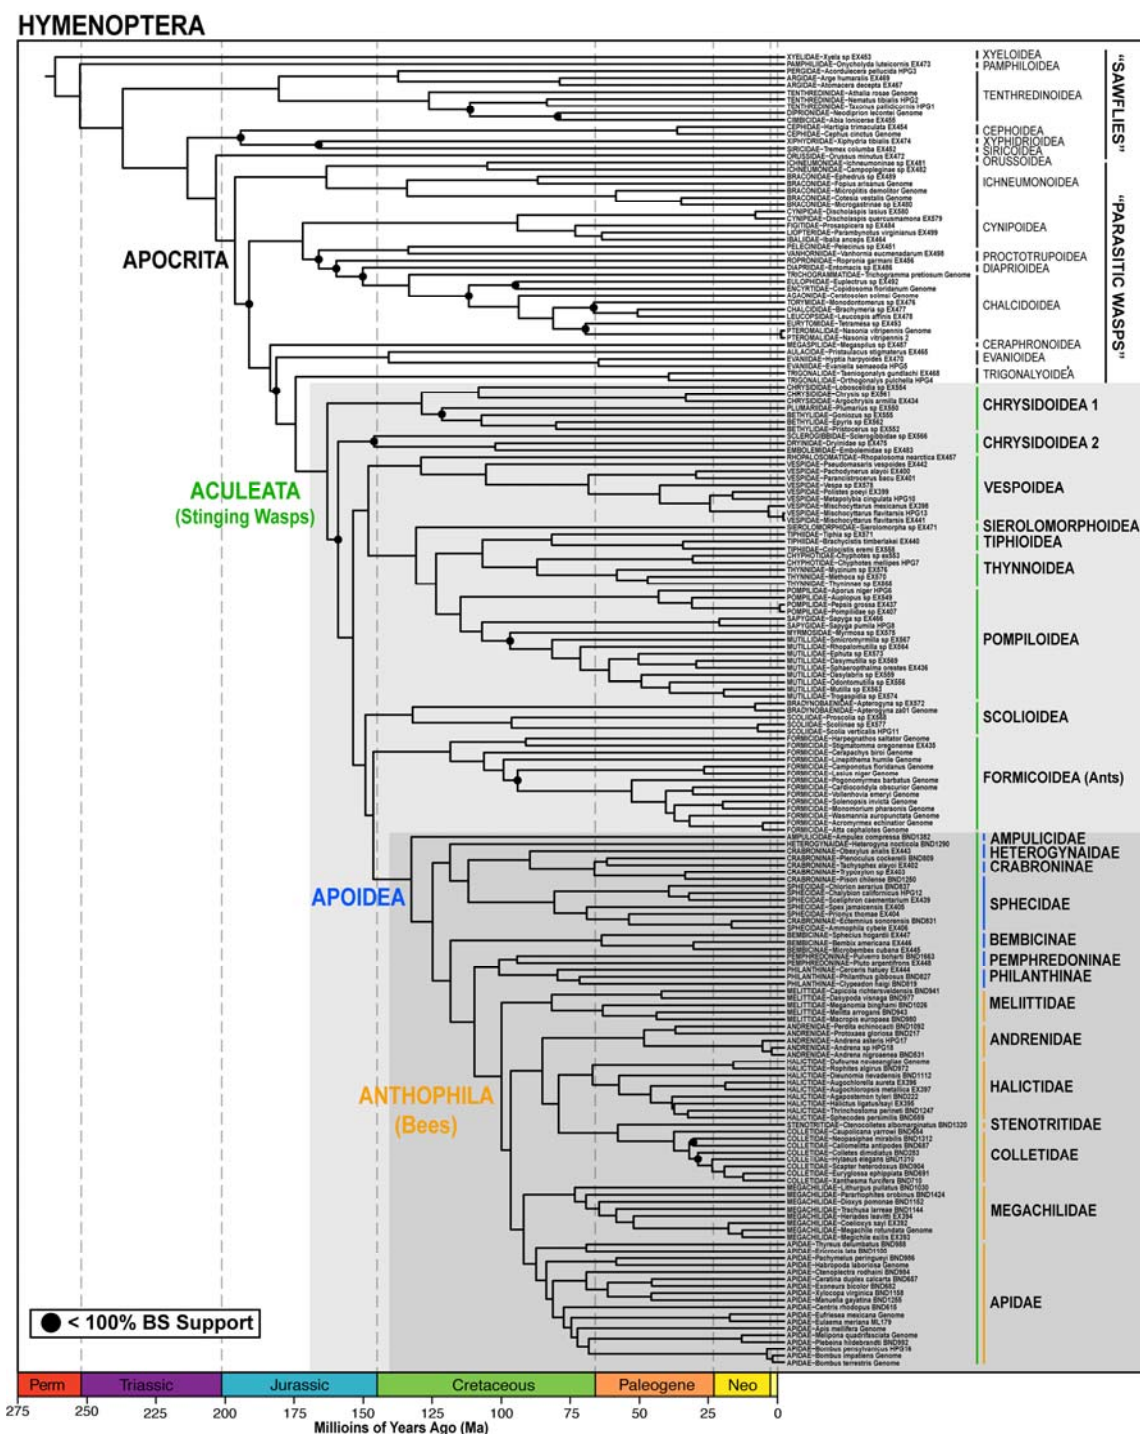

819

820 **Fig 2.**

821

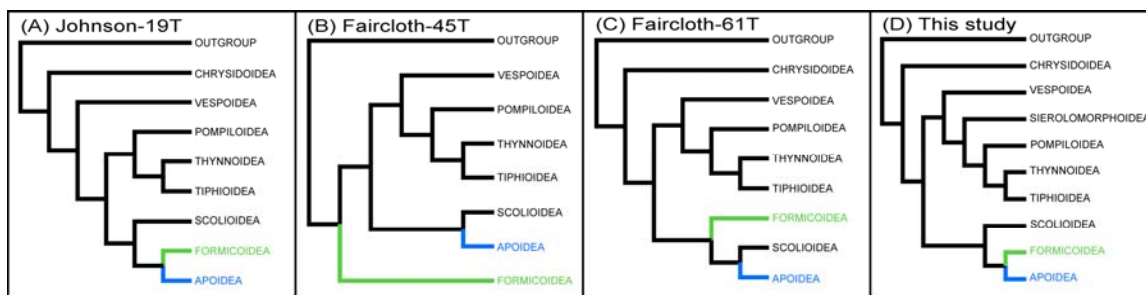

Source: http://biorxiv.org/content/10.1101/068957v1.full.pdf
